# Supplementary material
Source: publisher site journal article supplement (https://www.dovepress.com/article/244416)
Supplement: Supplementary file 1 [file get_supplementary_file.php]

Supporting Information


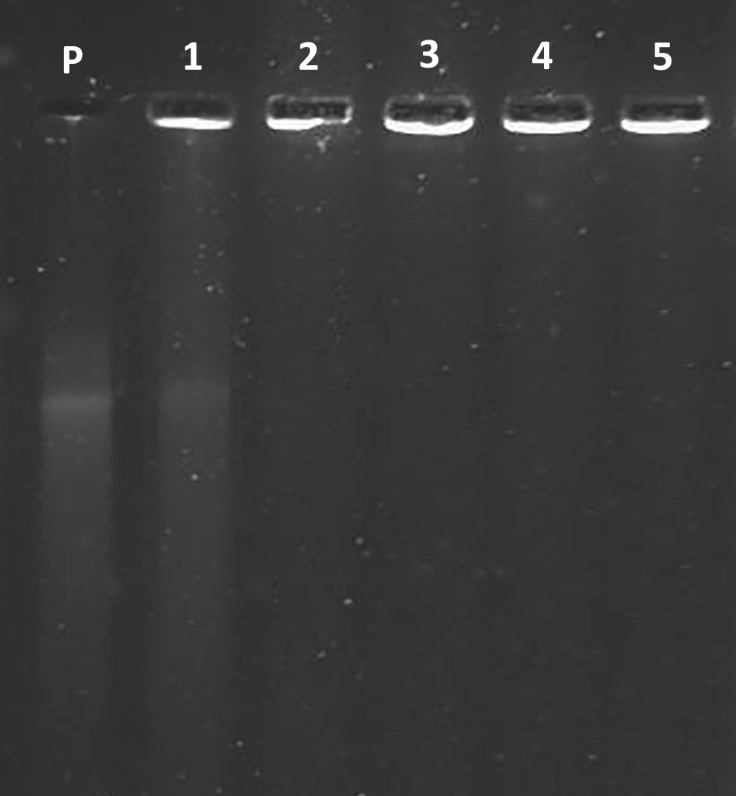


**Figure S1.** Gel electrophoresis of plasmid DNA, with different N/P ratio:
(P) Naked DNA, (1) N/P = 0.5, (2) N/P = 1, (3) N/P = 2, (4) N/P = 3 and (5) N/P = 5.


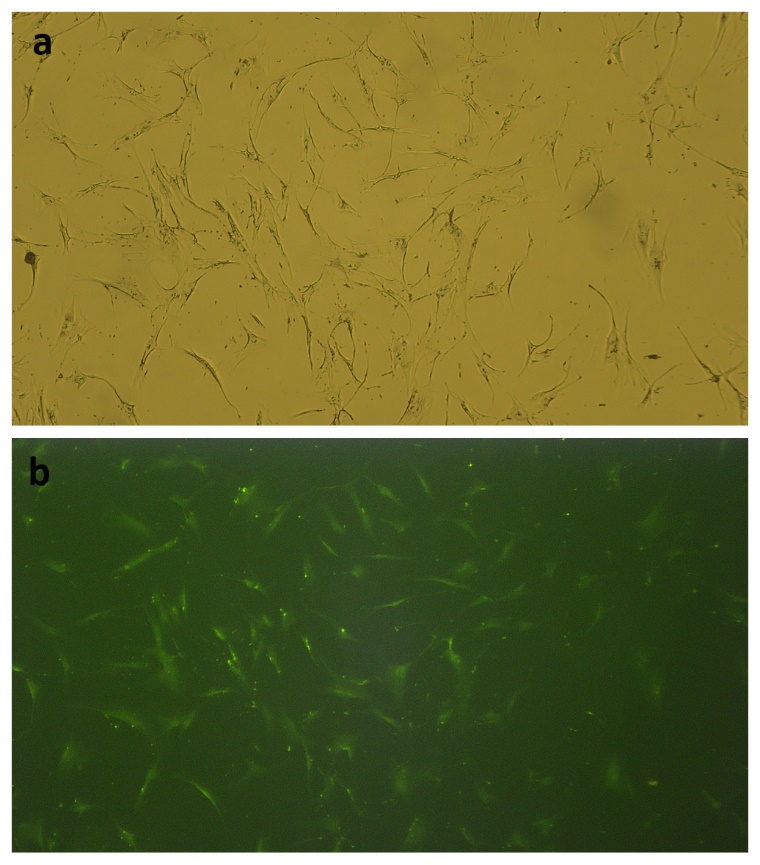


**Figure S2.** Transfection evaluation using microfluidic prepared nanoparticles with
 GFP plasmid DNA, (a) light microscopy image, (b) florescent microscopy image
(N/P = 10, 1µg/well).
